# Supplementary material for: UnAIDed Class Switching in Activated B-Cells Reveals Intrinsic Features of a Self-Cleaving IgH Locus
Source: PubMed Central journal article supplement (PMC8581400; doi:10.3389/fimmu.2021.737427), 2021-10-28
Supplement: DataSheet_1.pdf [file DataSheet_1.pdf]

## LEGENDS TO SUPPLEMENTAL INFORMATION

### **Supplemental Figure 1: AICDA gene alterations in patients P3, P4, P5 and P6.**

The coding region of exons is in red. Exon 3 encodes the catalytic domain of the AID enzyme.

### **Supplemental Figure 2: Validation of IgG and IgA-specific ELISA.**

Mouse monoclonal antibodies were obtained from a commercial source (IgM standard, Southern Biotechnologies) and from the French National Blood Center (clones BHS17, AY144 and E11) to test the specificity of anti-IgG and anti-IgA antibodies used for ELISA in this study. Serum from a naive AID-deficient mouse (mouse 9990) with spontaneously high IgM and not producing detectable IgG or IgA at Day 0 provided at internal control showing that the rise of IgG and IgA at Day 17 after SRBC immunization was not a cross-reaction with polyclonal IgM.

### **Supplemental Figure 3: IgM levels do not correlate with IgG or IgA levels.**

Serum IgM, IgG and IgA concentrations were determined by ELISA. Each point represents one AID-deficient mouse, before or after SRBC immunization. The linear regression shows that there is no correlation between IgM and IgA concentrations (top), or between IgM and IgG concentrations (bottom) ( $R^2 < 0.3$  in both cases).

### **Supplemental Table 1:**

Genomic coordinates used for aligning switch junctions from mouse and human samples are indicated.

### **Supplemental Table 2:**

Example of junction sequences. For each sequence read including a  $S_{\mu}$ - $S_{\gamma 1}$  junction, positions of both DNA breaks in  $S_{\mu}$  and  $S_{\gamma}$  are given by reference to chromosome GRCh38:14 (start at 105863000:1, reverse orientation). The fifty bases-long sequence centered onto the junction is shown.  **$S_{\mu}$  is in bold**,  $S_{\gamma}$  is underlined, **microhomologies are bold and underlined**, N stand for an inserted nucleotide.

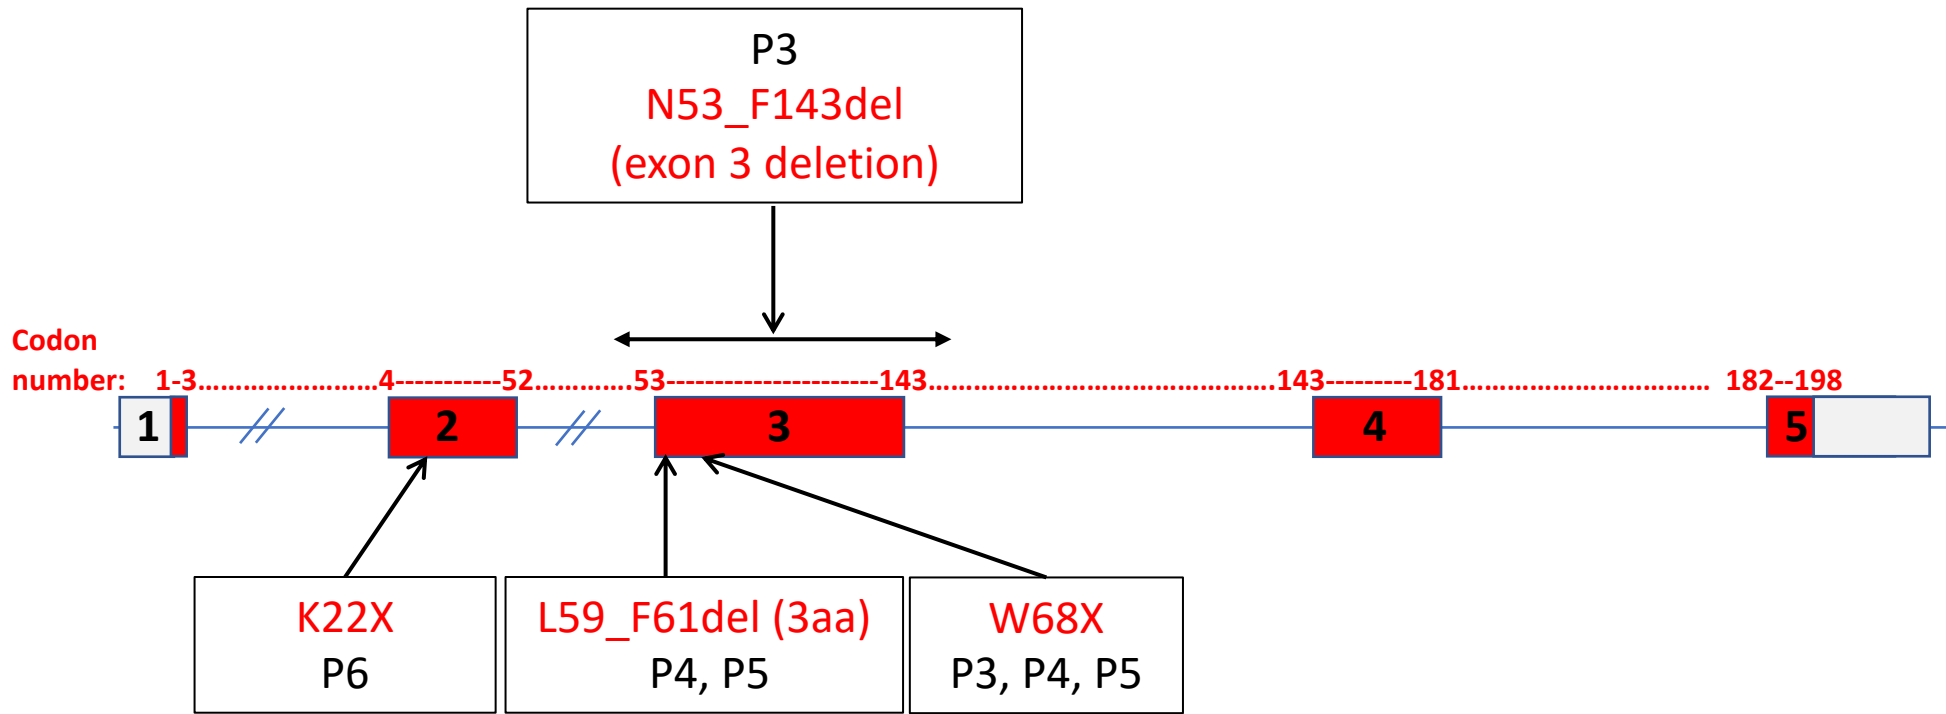

**Mutations in AID-deficient patients:**

- Patient P3 : W68X termination / N53\_F143del (exon 3)
- P4 and P5 : W68X termination / L59\_F61del (exon 3)
- P6: homozygous K22X termination (exon 2)

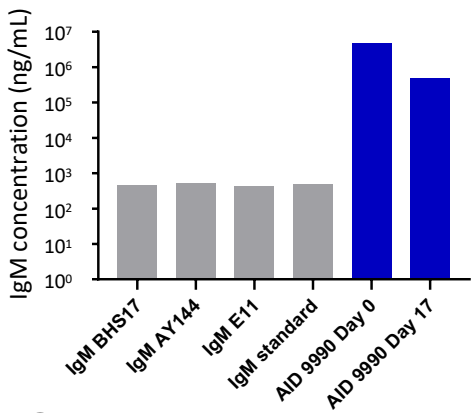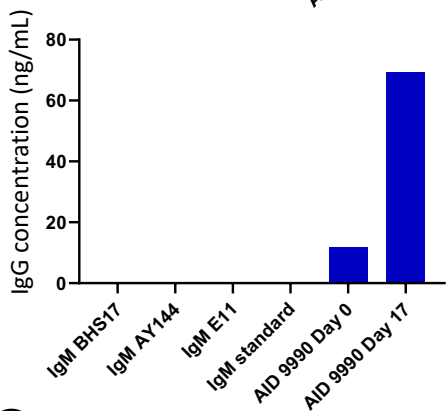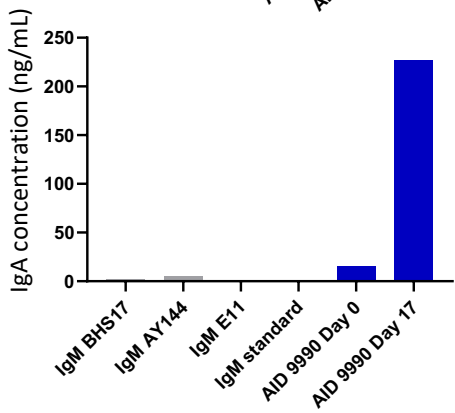

Supplemental Figure 2

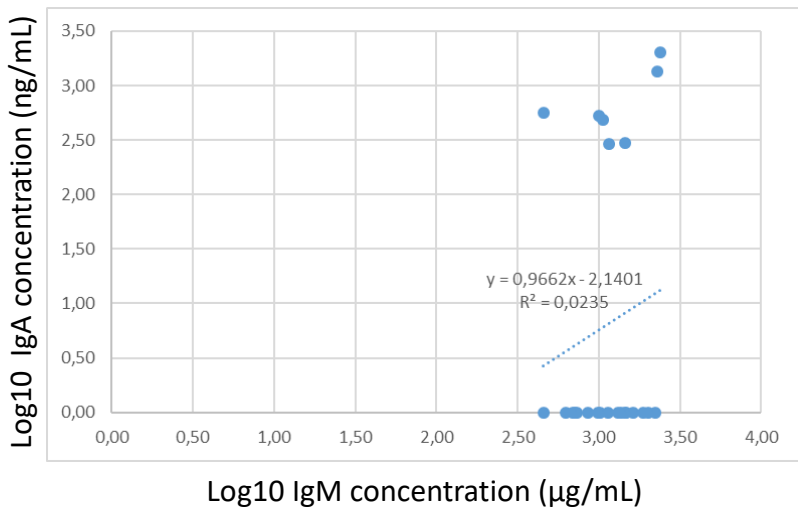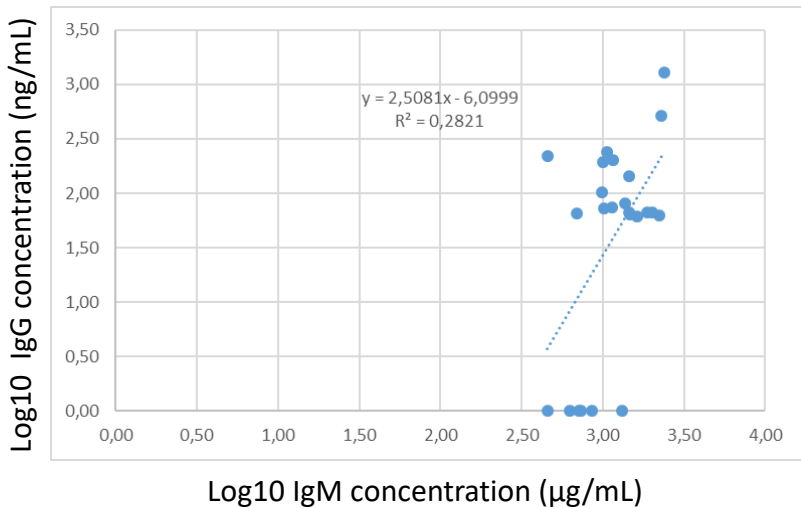

**Mouse sequence alignments:**

IgH constant gene cluster 218,000 bp sequence considered for analysis with CSReport algorithm:  
*Mus musculus*, chromosome 12, GRCm38.p3 C57BL/6J, gi|372099098: c113208001 (end)-113426000 (start)

|                    |        |        |
|--------------------|--------|--------|
| Switch $\mu$       | 0      | 3270   |
| Switch $\gamma 3$  | 59768  | 64768  |
| Switch $\gamma 1$  | 86477  | 95477  |
| Switch $\gamma 2b$ | 111067 | 118067 |
| Switch $\gamma 2c$ | 129068 | 137068 |
| Switch $\epsilon$  | 147752 | 152752 |
| Switch $\alpha$    | 158764 | 165764 |

**Human sequence alignments:**

IgH constant gene cluster 313,000 bp sequence considered for analysis with CSReport algorithm:  
*Homo sapiens*, chromosome 14, GRCh38:14:c105550001 (end):105863000 (start)

|                   |        |        |
|-------------------|--------|--------|
| Switch $\mu$      | 2253   | 6781   |
| Switch $\gamma 3$ | 87094  | 91594  |
| Switch $\gamma 1$ | 115553 | 119928 |
| Switch $\alpha 1$ | 151040 | 154334 |
| Switch $\gamma 2$ | 214709 | 218209 |
| Switch $\gamma 4$ | 232433 | 236933 |
| Switch $\epsilon$ | 257290 | 261271 |
| Switch $\alpha 2$ | 271075 | 274604 |

**Supplemental Table 1:** Genomic coordinates used for aligning switch junctions from mouse and human samples are indicated.

## Examples of S $\mu$ -S $\gamma$ 1 junctions from AID-/- patients

(patients P3 and P5 with complete homozygous absence the AID catalytic domain)

P3

>2491-119076-mHomo-2 **GTGCAGGAACCCGGCAATGAGATGGG**GAGGAGGTGGGCTGGTGGCCGAGAA  
>4262-119823-mHomo-5 **CTGATTTGGGCTGGTTGAGCAGAC**ACTGGACGCTGAACCTCGCGGACAG  
>3010-119769-mHomo-2 **GCTGAGCTGGGCTGGGCTGAGCTGG**CTAAGGTGACGCAGGTGGCGCCAGC  
>2812-118856-mHomo-4 **TGAGCTGGGCTGGGCTGGGCTGGG**CGCTTAGCCTCCTCAGAGGTCAGGGG  
>2521-118278-Blunt-0 **GCTGAGACAAGCAGGTCTGGTGGG**CGGCAGGACGAGCAGGGGACAGGCAC  
>2520-116813-mHomo-6 **AGCTGAGACAAGCAGGTCTGGTGG**GGAAGCATGGGGAGCAGGTGGGCAGCC  
>2520-116654-mHomo-8 **AGCTGAGACAAGCAGGTCTGGTGG**GAGGGAGGAAACAGGGGGCAGCTC  
>2516-118881-mHomo-2 **CTTTAGCTGAGACAAGCAGGTCTGG**GGCACACCCACCTGCAGTGGGACT  
>2513-117954-Blunt-0 **TGGCTTTAGCTGAGACAAGCAGGT**CCAGGTGGGGGGCAGGAGGAGCAGGG  
>2511-118287-mHomo-6 **GATGGCTTTAGCTGAGACAAGCAG**GGGACAGGCACTAGAGCTCAGGGCAA

P5

>2474-117725-mHomo-8 **TGGAAGCCAGCCTGGCTGTGCAGG**AGGAGCAGGGGGCAGGCACTGGAGCT  
>4912-118286-mHomo-4 **TGAGCCGGACTGGGTTGGGCTGAG**CAGGGGACAGGCACTAGAGCTCAGGG  
>2997-118523-mHomo-1 **TGGGCTGGGCTGCGCTGAGCTGGG**CAGGGCTGAGCTCTCAGGCAGGGGCA  
>2512-117350-mHomo-7 **ATGGCTTTAGCTGAGACAAGCAGGT**GGGCAGCCCCTGGAGCTCAGAGAGC  
>2512-116970-mHomo-6 **ATGGCTTTAGCTGAGACAAGCAGGT**GGGAGGCAGAATAAGCAGGGGACAG  
>2466-116496-mHomo-5 **ACAAAAGATGGAAGCCAGCCTGGG**CTAGTGGGAGATGGGCAAGCAGGGGGC

## Examples of S $\mu$ -S $\gamma$ 1 junctions from a healthy human control

>2646-119430-Blunt-0 **GCTGAGCTGAGCTGAACTGGGCTG**ACCACGCTGGGGCGGCAGGGTCAGGG  
>2472-118763-mHomo-4 **GATGGAAGCCAGCCTGGCTGTGCAG**AGTCAGCCAGAGCCTGTGGTGCAGG  
>2464-118345-mHomo-2 **AGACAAAAGATGGAAGCCAGCCTGG**AGGCATCACTCAGCTCCTAGACTTT  
>2489-118566-Blunt-0 **CTGTGCAGGAACCCGGCAATGAGAT**AACGTGTGCTTGAGACCAGGAGGGT  
>2455-119150-mHomo-4 **AGTAGAGGGAGACAAAAGATGGAAG**TAATGCAGGACACTGGGAGGCAGGG  
>3478-118971-Blunt-0 **GAGCTGAGCTTAGCTGGGCTGAGCT**CCATGCAGGGTGGGGAGGGCCAAGG  
>2667-119677-mHomo-2 **CTGAGTTGAACTGGGTTGAGCTGAG**GGGTGCCTGCAGAAGGGCACCACAG  
>2692-117317-mHomo-4 **CTGAGCTGAGCTGGGCTAAGTTGCAG**GTGAGCAGGGCCGGTGGGAAGCAG  
>2526-118312-Blunt-0 **GACAAGCAGGTCTGGTGGGCTGACC**GGGCAAGGCAGCCACAGGTGAGCAG  
>2487-118505-mHomo-1 **GGCTGTGCAGGAACCCGGCAATGAG**GGAAGGCGTTCCAGGGCTCAGGGCTG  
>2621-118522-Blunt-0 **CCTAGACTAAACAAGGCTGAACTGG**TAGGGCTGAGCTCTCAGGCAGGGG  
>2686-118513-Insert-1 **GCTGAGCTGAGCTGAGCTGGGCTAAN**TCCAGGGCTCAGGGCTGAGCTCT  
>2631-119304-mHomo-5 **ACAAGGCTGAACTGGGCTGAGCTGA**AGGGCGCCGACCCTATGCAGTGTCT  
>2684-119725-mHomo-1 **GAGCTGAGCTGAGCTGAGCTGGGCT**CTGGGGCAGGCCGGGCCTGACCTTG  
>2587-118330-Blunt-0 **ATGGACTCAGATGGGCAAACTGACT**GAGCAGGGCTGGTGGGAGGCATCA  
>2711-118904-mHomo-1 **GTTGCACCAGGTGAGCTGAGCTGAG**ACTCCAGGGCCACTGGGCCAGCGGC

(S $\mu$  is in bold, S $\gamma$  is underlined, microhomologies are bold and underlined,

N stand for an inserted nucleotide).

**Supplemental Table 2.** Example of junction sequences.
